## CORRECTION

# Correction: Detection and recognition of foreign objects in Pu-erh Sun-dried green tea using an improved YOLOv8 based on deep learning

The *PLOS One* Staff

There are errors in the author affiliations. The correct affiliations are as follows:

Houqiao Wang<sup>1,2</sup>, Xiaoxue Guo<sup>1</sup>, Shihao Zhang<sup>1</sup>, Gongming Li<sup>1</sup>, Qiang Zhao<sup>1</sup>, Zejun Wang<sup>2</sup>

**1** College of Mechanical and Electrical Engineering, Wuhan Donghu University, Wuhan, China, **2** College of Tea Science, Yunnan Agricultural University, Kunming, China

The publisher apologizes for the error.

## Reference

1. Wang H, Guo X, Zhang S, Li G, Zhao Q, Wang Z. Detection and recognition of foreign objects in Pu-erh Sun-dried green tea using an improved YOLOv8 based on deep learning. *PLoS One*. 2025;20(1): e0312112. <https://doi.org/10.1371/journal.pone.0312112> PMID: [39775324](https://pubmed.ncbi.nlm.nih.gov/39775324/)

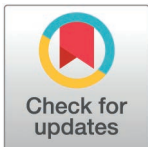

## OPEN ACCESS

**Citation:** The *PLOS One* Staff (2025) Correction: Detection and recognition of foreign objects in Pu-erh Sun-dried green tea using an improved YOLOv8 based on deep learning. *PLoS ONE* 20(3): e0321409. <https://doi.org/10.1371/journal.pone.0321409>

**Published:** March 28, 2025

**Copyright:** © 2025 The *PLOS One* Staff. This is an open access article distributed under the terms of the [Creative Commons Attribution License](https://creativecommons.org/licenses/by/4.0/), which permits unrestricted use, distribution, and reproduction in any medium, provided the original author and source are credited.
